# Supplementary material for: Biochemical Approaches on Commercial Strains of Agaricus subrufescens Growing under Two Environmental Cultivation Conditions
Source: MDPI journal article supplement (doi:10.3390/jof8060616), 2022-06-09
Supplement: s1 [file s1]

## Supplementary material

---

### Biochemical approaches on Commercial Strains of *Agaricus subrufescens* Growing under two Environmental Cultivation Conditions

Daiana Almeida, Rossana V. C. Cardoso, Carla Pereira, Maria José Alves, Isabel C. F. R. Ferreira, Diego Cunha Zied, Wagner G. Vieira Junior, Cinthia E. C. Caitano, Ângela Fernandes, Lillian Barros

**Table S1.** Detailed fatty acid composition of *Agaricus subrufescens* samples produced in the field and in controlled environment crops.

|          | Field           |           |           |           |             |             | Controlled environment |           |             |             |           |           |
|----------|-----------------|-----------|-----------|-----------|-------------|-------------|------------------------|-----------|-------------|-------------|-----------|-----------|
|          | AS 98/11        | AS 18/01  | AS CS7    | AS 19/01  | AS 16/01    | AS 04/49    | AS 98/11               | AS 18/01  | AS CS7      | AS 19/01    | AS 16/01  | AS 04/49  |
|          | Fatty acids (%) |           |           |           |             |             |                        |           |             |             |           |           |
| C6:0     | 0.187±0.004     | 0.15±0.01 | 1.6±0.1   | 0.50±0.01 | 0.180±0.005 | 0.21±0.01   | 0.190±0.004            | 0.26±0.02 | 0.57±0.01   | 0.40±0.04   | 0.37±0.01 | 0.29±0.02 |
| C14:0    | 0.32±0.02       | 0.42±0.01 | 0.8±0.1   | 0.5±0.1   | 0.31±0.02   | 0.25±0.02   | 0.29±0.01              | 0.41±0.01 | 0.44±0.01   | 0.42±0.03   | 0.25±0.02 | 0.36±0.01 |
| C15:0    | 0.9±0.1         | 0.94±0.05 | 1.75±0.02 | 1.1±0.1   | 0.75±0.04   | 0.828±0.001 | 0.85±0.02              | 0.93±0.01 | 1.02±0.01   | 1.1±0.1     | 0.92±0.05 | 0.9±0.1   |
| C16:0    | 12.7±0.2        | 15±1      | 14.3±0.1  | 17.6±0.03 | 13.5±0.1    | 13.4±0.3    | 12.31±0.01             | 15.0±0.01 | 17±1        | 16.5±0.2    | 15±1      | 14±1      |
| C16:1    | 0.173±0.005     | 0.25±0.02 | 0.35±0.01 | 0.37±0.01 | 0.32±0.03   | 0.19±0.01   | 0.108±0.005            | 0.18±0.02 | 0.157±0.001 | 0.11±0.01   | 0.13±0.01 | 0.17±0.01 |
| C17:0    | 0.73±0.01       | 0.93±0.04 | 0.98±0.01 | 1.0±0.1   | 0.98±0.02   | 0.81±0.01   | 0.77±0.01              | 1.12±0.03 | 1.21±0.04   | 1.0±0.1     | 1.37±0.02 | 1.07±0.04 |
| C18:0    | 3.8±0.1         | 4.9±0.3   | 4.42±0.07 | 4.97±0.02 | 5.0±0.1     | 4.4±0.2     | 4.250±0.001            | 4.6±0.3   | 5.23±0.01   | 5.15±0.05   | 4.9±0.3   | 4.9±0.3   |
| C18:1n9c | 1.2±0.1         | 2.1±0.2   | 1.54±0.03 | 1.5±0.1   | 1.6±0.1     | 1.28±0.03   | 1.19±0.03              | 1.5±0.1   | 1.9±0.1     | 2.0±0.1     | 1.6±0.1   | 1.4±0.1   |
| C18:2n6c | 73.44±0.16      | 68±1      | 66.2±0.2  | 64±1      | 70.0±0.3    | 71±1        | 72.8±0.1               | 68.1±0.1  | 64±1        | 64±1        | 67±2      | 67.5±0.4  |
| C20:0    | 1.48±0.01       | 1.69±0.03 | 1.38±0.01 | 1.69±0.01 | 1.7±0.1     | 1.7±0.1     | 1.50±0.01              | 1.34±0.04 | 1.83±0.03   | 1.7±0.2     | 1.6±0.1   | 1.6±0.1   |
| C20:1    | 0.33±0.02       | 0.38±0.04 | 0.55±0.01 | 0.35±0.02 | 0.23±0.01   | 0.38±0.04   | 0.32±0.01              | 0.32±0.03 | 0.14±0.01   | 0.474±0.004 | 0.37±0.01 | 0.37±0.03 |
| C20:2    | 0.15±0.01       | 0.16±0.01 | 0.16±0.01 | 0.16±0.01 | 0.14±0.01   | 0.18±0.02   | 0.19±0.01              | 0.17±0.02 | 0.155±0.001 | 0.20±0.01   | 0.13±0.01 | 0.20±0.01 |
| C21:0    | 0.37±0.02       | 0.41±0.01 | 0.78±0.02 | 0.45±0.04 | 0.34±0.03   | 0.42±0.02   | 0.39±0.01              | 0.43±0.03 | 0.55±0.01   | 0.44±0.02   | 0.46±0.03 | 0.49±0.02 |
| C22:0    | 2.83±0.03       | 3.1±0.1   | 3.06±0.04 | 3.1±0.1   | 3.08±0.05   | 3.04±0.02   | 3.19±0.03              | 3.3±0.1   | 3.3±0.1     | 3.5±0.3     | 3.06±0.03 | 3.5±0.3   |
| C23:0    | 0.54±0.03       | 0.66±0.01 | 1.04±0.03 | 1.4±0.1   | 0.7±0.02    | 1.29±0.04   | 0.55±0.02              | 1.1±0.1   | 1.2±0.1     | 1.4±0.1     | 1.3±0.1   | 1.42±0.04 |
| C24:0    | 0.89±0.01       | 1.3±0.1   | 1.07±0.03 | 0.8±0.1   | 1.18±0.02   | 1.1±0.1     | 1.05±0.01              | 1.22±0.03 | 1.18±0.03   | 1.4±0.1     | 1.2±0.1   | 1.5±0.1   |
| SFA      | 24.7±0.3        | 29±1      | 31.2±0.2  | 33±1      | 27.8±0.2    | 27±1        | 25.3±0.1               | 29.7±0.2  | 33±1        | 33±1        | 30±2      | 30.4±0.4  |
| MUFA     | 1.7±0.1         | 2.8±0.2   | 2.44±0.01 | 2.2±0.1   | 2.1±0.1     | 1.8±0.1     | 1.62±0.04              | 2.0±0.2   | 2.2±0.1     | 2.6±0.1     | 2.1±0.1   | 1.94±0.03 |
| PUFA     | 73.6±0.2        | 68±1      | 66.3±0.2  | 65±1      | 70.1±0.3    | 71±1        | 73.0±0.1               | 68.3±0.1  | 65±1        | 64±1        | 67±2      | 67.7±0.4  |

SFA - Saturated fatty acids; MUFA - Monounsaturated fatty acids; PUFA - Polyunsaturated fatty acids.

**Table S2.** Detailed tocopherols, phenolic acids and related compounds composition of *Agaricus subrufescens* samples produced in the field and in controlled environment crops.

|                                                | Field           |                 |                 |                 |                |                 | Controlled environment |                 |                 |                  |                 |                 |  |
|------------------------------------------------|-----------------|-----------------|-----------------|-----------------|----------------|-----------------|------------------------|-----------------|-----------------|------------------|-----------------|-----------------|--|
|                                                | AS 98/11        | AS 18/01        | AS CS7          | AS 19/01        | AS 16/01       | AS 04/49        | AS 98/11               | AS 18/01        | AS CS7          | AS 19/01         | AS 16/01        | AS 04/49        |  |
| Tocopherols (µg/100 g dw)                      |                 |                 |                 |                 |                |                 |                        |                 |                 |                  |                 |                 |  |
| <i>α</i> -Tocopherol                           | 26.8±0.2c       | 20.5±0.6e       | 13.91±0.03<br>i | 16.7±0.1g       | 26.7±0.4c      | 47.5±0.6a       | 23.5±0.1d              | 17.1±0.7f       | 13.2±0.2j       | 14.5±0.7h        | 14.4±0.3h       | 40.4±0.3b       |  |
| <i>β</i> -Tocopherol                           | 76.0±0.3a       | 64.7±0.3b       | 57.6±0.1e       | 64.5±0.3b       | 60±1d          | 76.5±0.3a       | 65.0±0.6b              | 56.8±0.8f       | 50.72±0.03<br>g | 59.8±0.8d        | 36.6±0.1h       | 63±1c           |  |
| <i>δ</i> -Tocopherol                           | 44.1±0.6d       | 54.6±0.3c       | 35.5±0.2h       | 31.4±0.1i       | 42.7±0.8e      | 74.5±0.3a       | 36±1g                  | 43.7±0.7d       | 20.6±0.1k       | 24.5±0.1j        | 40.3±0.1f       | 62.2±0.1b       |  |
| Sum                                            | 146.9±0.1c      | 140±1d          | 107.0±0.1i      | 112.6±0.1h      | 130±1e         | 198.6±0.6a      | 124.6±0.6f             | 117.6±0.6g      | 84.4±0.4l       | 98.8±0.3j        | 91.2±0.4k       | 166±1b          |  |
| Phenolic acids and related compounds (µg/g dw) |                 |                 |                 |                 |                |                 |                        |                 |                 |                  |                 |                 |  |
| Protocatechuic acid                            | 16.43±0.03<br>e | 11.62±0.01<br>k | 20.1±0.1a       | 19.73±0.08<br>b | 15.6±0.1g      | 15.9±0.1f       | 13.4±0.5j              | 11.2±0.2l       | 17.41±0.06<br>d | 18.5±0.2c        | 14.39±0.06<br>h | 13.89±0.04<br>i |  |
| <i>p</i> -hydroxybenzoic acid                  | 235.5±0.7b      | 189.1±0.7d      | 150.8±0.4j      | 194.3±0.4c      | 171.8±0.4<br>g | 167.0±0.2i      | 234±1a                 | 184.3±0.2e      | 140±1k          | 173.71±0.08<br>f | 168.1±0.8h      | 138.7±0.4l      |  |
| <i>p</i> -coumaric acid                        | 69.5±0.7f       | 64.6±0.1i       | 74.3±0.5e       | 136.8±0.6c      | 171.7±0.8<br>a | 68.5±0.3g       | 57.6±0.1l              | 62.6±0.2j       | 66.61±0.06<br>h | 123.5±0.9d       | 162.8±0.3b      | 56.7±0.8k       |  |
| Sum                                            | 321.4±0.1d      | 265.4±0.6g      | 245.2±0.1j      | 351±1b          | 359.0±0.5<br>a | 251.4±0.6i      | 305±1f                 | 258.1±0.3h      | 224±1k          | 316±1e           | 345±1c          | 209.3±0.3l      |  |
| Cinnamic acid                                  | 10.6±0.1j       | 16.6±0.2c       | 14.8±0.3e       | 14.08±0.03f     | 23.7±0.1a      | 13.12±0.07<br>g | 9.86±0.09<br>k         | 15.66±0.04<br>d | 12.01±0.07<br>h | 13.2±0.1g        | 21.3±0.1b       | 11.1±0.1i       |  |

Tocopherols calibration curves: α-tocopherol ( $y = 1.295x$ ;  $R^2 = 0.991$ ; LOD = 18.06 ng/mL; LOQ = 60.20 ng/mL), β-tocopherol ( $y = 0.396x$ ;  $R^2 = 0.992$ ; LOD 25.82 ng/mL; LOQ = 86.07 ng/mL), and δ-tocopherol ( $y = 0.678x$ ;  $R^2 = 0.992$ ; LOD = 20.09 ng/mL; LOQ = 66.95 ng/mL). Phenolic acids and related compounds calibration curves: protocatechuic acid ( $y = 166966x + 251225$ ;  $R^2 = 0.9978$ ); *p* hydroxybenzoic acid ( $y = 21.680x + 9264.2$ ;  $R^2 = 0.9983$ ); *p*-coumaric acid ( $y = 93234x + 56858$ ;  $R^2 = 0.9936$ ) and cinnamic acid ( $y = 135559x + 222170$ ;  $R^2 = 0.9955$ ).
